# Supplementary material for: New approach to evaluate satellite derived XCO 2 over oceans by integrating ship and aircraft observations
Source: Copernicus journal article supplement (doi:10.5194/acp-2020-1094), 2020-10-30
Supplement: Supplementary file 1 [file acp-2020-1094-supplement.pdf]

Supplementary Materials for the manuscript:

5 **New approach to evaluate satellite derived XCO<sub>2</sub> over oceans by  
integrating ship and aircraft observations**

Astrid Müller<sup>1</sup>, Hiroshi Tanimoto<sup>1</sup>, Takafumi Sugita<sup>1</sup>, Toshinobu Machida<sup>1</sup>, Shin-ichiro Nakaoka<sup>1</sup>, Prabir K. Patra<sup>2</sup>, Joshua Laughner<sup>3</sup>, David Crisp<sup>4</sup>

1 National Institute for Environmental Studies, Tsukuba, Japan

10 2 Japan Agency for Marine-Earth Science and Technology, Yokohama, Japan

3 California Institute of Technology, Pasadena, CA, USA

4 Jet Propulsion Laboratory/California Institute of Technology, Pasadena, CA, USA

*Correspondence and request for material should be addressed to:*

15 Hiroshi Tanimoto (tanimoto@nies.go.jp), Astrid Müller (mueller.astrid@nies.go.jp)

**Table S1.** The monthly averaged (Avg.) values and the standard deviation (Std.) of the ship and aircraft CO<sub>2</sub> retrievals for the latitude range 20° N–30° N, 2014–2017.

| <b>Date<br/>(MM/YY)</b> | <b>Avg. ship<br/>(ppm)</b> | <b>Std.</b> | <b>Avg. aircraft<br/>(ppm)</b> | <b>Std.</b> |
|-------------------------|----------------------------|-------------|--------------------------------|-------------|
| 01/14                   | –                          | –           | 397.60                         | 0.74        |
| 02/14                   | 401.51                     | 1.84        | 396.52                         | 0.54        |
| 03/14                   | 404.34                     | 1.69        | 398.92                         | 2.01        |
| 04/14                   | 403.87                     | 1.78        | 400.09                         | 1.91        |
| 05/14                   | 404.43                     | 0.57        | 402.26                         | 1.53        |
| 06/14                   | 401.45                     | 0.67        | 401.95                         | 1.26        |
| 07/14                   | 398.74                     | 0.22        | 400.07                         | 1.14        |
| 08/14                   | 394.89                     | 3.31        | 397.36                         | 1.20        |
| 09/14                   | 395.36                     | 1.12        | 395.73                         | 1.21        |
| 10/14                   | 397.66                     | 1.38        | 395.76                         | 0.85        |
| 11/14                   | 401.15                     | 1.46        | 397.67                         | 0.87        |
| 12/14                   | 401.77                     | 1.16        | 398.71                         | 1.05        |
| 01/15                   | –                          | –           | 399.27                         | 0.82        |
| 02/15                   | 403.61                     | 0.44        | 399.58                         | 1.18        |
| 03/15                   | 404.10                     | 2.22        | 400.29                         | 1.45        |
| 04/15                   | 405.02                     | 1.67        | 401.97                         | 1.82        |
| 05/15                   | 403.32                     | 1.56        | 403.99                         | 1.46        |
| 06/15                   | 403.87                     | 0.26        | 403.96                         | 0.99        |
| 07/15                   | 401.60                     | 0.38        | 401.43                         | 0.87        |
| 08/15                   | 399.53                     | 0.62        | 399.61                         | 1.08        |
| 09/15                   | 397.57                     | 0.55        | 398.22                         | 0.92        |
| 10/15                   | 401.24                     | 1.34        | 398.89                         | 1.16        |
| 11/15                   | 400.74                     | 0.57        | 400.02                         | 0.96        |
| 12/15                   | 403.99                     | 1.21        | 401.92                         | 1.06        |
| 01/16                   | 406.56                     | 1.77        | 402.42                         | 0.80        |
| 02/16                   | 405.30                     | 0.30        | 403.36                         | 0.62        |
| 03/16                   | 407.33                     | 1.57        | 404.02                         | 2.33        |
| 04/16                   | 408.63                     | 1.78        | 407.07                         | 1.97        |
| 05/16                   | 409.46                     | 1.93        | 408.62                         | 1.70        |
| 06/16                   | 407.51                     | 0.70        | 406.32                         | 1.34        |
| 07/16                   | 405.74                     | 0.38        | 404.35                         | 1.57        |
| 08/16                   | 401.81                     | 0.76        | 402.30                         | 1.04        |
| 09/16                   | 400.82                     | 0.07        | 401.31                         | 1.04        |
| 10/16                   | 402.13                     | 1.00        | 401.84                         | 1.01        |
| 11/16                   | 405.40                     | 2.01        | 403.34                         | 0.93        |
| 12/16                   | 409.49                     | 3.26        | 404.96                         | 0.90        |

**Table S2.** The monthly averaged (Avg.) values and the standard deviation (Std.) of the ship and aircraft CO<sub>2</sub> retrievals for the latitude range 0° N–10° N, 2014–2017.

25

| <b>Date<br/>(MM/YY)</b> | <b>Avg. ship<br/>(ppm)</b> | <b>Std.</b> | <b>Avg. aircraft<br/>(ppm)</b> | <b>Std.</b> |
|-------------------------|----------------------------|-------------|--------------------------------|-------------|
| 01/14                   | –                          | –           | 397.60                         | 0.53        |
| 02/14                   | 398.44                     | 0.55        | –                              | –           |
| 03/14                   | 398.78                     | 0.80        | 398.48                         | 0.55        |
| 04/14                   | 399.16                     | 0.76        | 399.12                         | 0.82        |
| 05/14                   | 400.66                     | 0.62        | 399.67                         | 1.16        |
| 06/14                   | 399.01                     | 0.98        | 400.54                         | 0.93        |
| 07/14                   | 397.81                     | 0.39        | 399.17                         | 0.85        |
| 08/14                   | 397.34                     | 0.25        | 397.72                         | 0.24        |
| 09/14                   | 396.85                     | 0.24        | 396.20                         | 0.35        |
| 10/14                   | 396.73                     | 0.33        | 396.85                         | 0.36        |
| 11/14                   | 397.44                     | 0.37        | 397.09                         | 0.46        |
| 12/14                   | 397.97                     | 0.21        | 397.53                         | 0.22        |
| 01/15                   | –                          | –           | –                              | –           |
| 02/15                   | 401.53                     | 0.69        | 399.79                         | 0.48        |
| 03/15                   | 401.15                     | 0.75        | 399.95                         | 0.21        |
| 04/15                   | 401.91                     | 0.90        | 399.49                         | 0.79        |
| 05/15                   | 402.42                     | 1.45        | 401.34                         | 1.20        |
| 06/15                   | 401.36                     | 0.93        | 401.78                         | 0.80        |
| 07/15                   | 399.16                     | 1.08        | –                              | –           |
| 08/15                   | 398.58                     | 0.26        | 399.36                         | 0.22        |
| 09/15                   | –                          | –           | 398.88                         | 0.41        |
| 10/15                   | 399.10                     | 0.41        | 398.89                         | 0.31        |
| 11/15                   | 399.49                     | 0.26        | –                              | –           |
| 12/15                   | 401.68                     | 0.62        | 400.97                         | 0.35        |
| 01/16                   | 402.47                     | 0.10        | 402.31                         | 0.42        |
| 02/16                   | 403.85                     | 0.23        | 402.92                         | 0.23        |
| 03/16                   | 404.39                     | 0.39        | 404.50                         | 0.61        |
| 04/16                   | 406.39                     | 0.39        | 405.13                         | 0.62        |
| 05/16                   | 405.50                     | 0.84        | 405.44                         | 0.80        |
| 06/16                   | 405.38                     | 0.40        | –                              | –           |
| 07/16                   | 404.24                     | 0.45        | –                              | –           |
| 08/16                   | 403.55                     | 0.31        | 402.94                         | 0.30        |
| 09/16                   | 402.73                     | 0.32        | 402.75                         | 0.32        |
| 10/16                   | 402.12                     | 0.20        | 401.98                         | 0.30        |
| 11/16                   | 403.22                     | 0.51        | 402.64                         | 0.33        |
| 12/16                   | 404.53                     | 0.32        | 404.46                         | 0.40        |

| <b>Date<br/>(MM/YY)</b> | <b>Avg. ship<br/>(ppm)</b> | <b>Std.</b> | <b>Avg. aircraft<br/>(ppm)</b> | <b>Std.</b> |
|-------------------------|----------------------------|-------------|--------------------------------|-------------|
| 01/14                   | 396.52                     | 1.21        | 396.00                         | 0.48        |
| 02/14                   | 395.30                     | 0.34        | –                              | –           |
| 03/14                   | 394.42                     | 0.27        | 396.28                         | 0.83        |
| 04/14                   | 395.63                     | 1.30        | 396.66                         | 0.86        |
| 05/14                   | 394.49                     | 0.32        | 397.18                         | 0.82        |
| 06/14                   | 395.07                     | 0.65        | 398.64                         | 0.74        |
| 07/14                   | 395.11                     | 0.30        | 398.77                         | 0.57        |
| 08/14                   | 395.66                     | 0.31        | 397.39                         | 0.42        |
| 09/14                   | 395.71                     | 0.44        | 396.53                         | 0.33        |
| 10/14                   | 396.29                     | 0.08        | 397.21                         | 0.54        |
| 11/14                   | 396.61                     | 0.38        | 398.36                         | 0.82        |
| 12/14                   | 398.76                     | 1.19        | 398.52                         | 0.59        |
| 01/15                   | –                          | –           | –                              | –           |
| 02/15                   | 396.63                     | 0.38        | 397.65                         | 0.54        |
| 03/15                   | 396.61                     | 0.13        | 397.88                         | 0.67        |
| 04/15                   | 397.76                     | 0.67        | 398.50                         | 0.32        |
| 05/15                   | 397.68                     | 0.66        | 399.62                         | 0.80        |
| 06/15                   | 397.19                     | 0.24        | 400.19                         | 0.88        |
| 07/15                   | 397.88                     | 0.28        | –                              | –           |
| 08/15                   | 398.03                     | 0.30        | 399.35                         | 0.29        |
| 09/15                   | –                          | –           | 399.25                         | 0.39        |
| 10/15                   | 398.67                     | 0.40        | 399.00                         | 0.40        |
| 11/15                   | 399.42                     | 0.10        | –                              | –           |
| 12/15                   | 400.36                     | 1.16        | 402.19                         | 0.61        |
| 01/16                   | 400.30                     | 0.26        | 400.95                         | 0.43        |
| 02/16                   | 400.95                     | 1.14        | 401.23                         | 0.48        |
| 03/16                   | 401.17                     | 1.12        | 402.94                         | 0.64        |
| 04/16                   | 400.47                     | 0.55        | 403.22                         | 0.89        |
| 05/16                   | 401.01                     | 0.50        | 402.18                         | 0.51        |
| 06/16                   | 401.18                     | 0.16        | –                              | –           |
| 07/16                   | 402.09                     | 0.54        | –                              | –           |
| 08/16                   | 401.91                     | 0.49        | 402.92                         | 0.26        |
| 09/16                   | 401.96                     | 0.63        | 402.90                         | 0.42        |
| 10/16                   | 402.02                     | 0.38        | 402.04                         | 0.41        |
| 11/16                   | 402.47                     | 0.31        | 402.76                         | 0.55        |
| 12/16                   | 402.08                     | 0.21        | 403.91                         | 0.48        |

35 **Table S4.** The monthly averaged (Avg.) values and the standard deviation (Std.) of the satellite XCO<sub>2</sub> retrievals of GOSAT (NIES, ACOS) and OCO-2 for the latitude range 20° N–30° N, 2014–2017.

| <b>Date<br/>(MM/YY)</b> | <b>Avg. NIES<br/>(ppm)</b> | <b>Std.</b> | <b>Avg. ACOS<br/>(ppm)</b> | <b>Std.</b> | <b>Avg. OCO-2<br/>(ppm)</b> | <b>Std.</b> |
|-------------------------|----------------------------|-------------|----------------------------|-------------|-----------------------------|-------------|
| 01/14                   | –                          | –           | 397.90                     | 0.00        | –                           | –           |
| 02/14                   | –                          | –           | 394.84                     | 3.69        | –                           | –           |
| 03/14                   | 398.36                     | 0.57        | 397.41                     | 1.01        | –                           | –           |
| 04/14                   | 400.10                     | 1.26        | 398.70                     | 1.02        | –                           | –           |
| 05/14                   | 401.24                     | 1.49        | 399.74                     | 1.18        | –                           | –           |
| 06/14                   | 401.49                     | 1.64        | 399.78                     | 1.24        | –                           | –           |
| 07/14                   | 399.57                     | 0.70        | 397.93                     | 1.12        | –                           | –           |
| 08/14                   | 396.54                     | 1.69        | 395.78                     | 1.09        | –                           | –           |
| 09/14                   | 396.05                     | 1.43        | 394.79                     | 1.07        | 394.73                      | 0.63        |
| 10/14                   | 395.30                     | 1.10        | 395.21                     | 0.82        | 395.48                      | 0.62        |
| 11/14                   | –                          | –           | 396.57                     | 1.12        | 396.01                      | 0.87        |
| 12/14                   | –                          | –           | 397.16                     | 1.02        | 398.15                      | 1.14        |
| 01/15                   | –                          | –           | 397.87                     | 1.04        | 398.90                      | 0.65        |
| 02/15                   | 399.26                     | 1.37        | 398.33                     | 0.94        | 400.06                      | 0.68        |
| 03/15                   | 399.86                     | 1.11        | 399.43                     | 1.09        | 400.46                      | 0.85        |
| 04/15                   | 401.54                     | 1.30        | 400.90                     | 1.12        | 401.05                      | 0.90        |
| 05/15                   | 402.89                     | 0.99        | 401.81                     | 1.05        | 401.82                      | 0.56        |
| 06/15                   | 402.67                     | 0.71        | 401.34                     | 1.20        | 401.35                      | 0.69        |
| 07/15                   | 401.06                     | 1.39        | 399.45                     | 1.20        | 399.78                      | 0.97        |
| 08/15                   | 398.33                     | 1.62        | 397.32                     | 1.27        | 397.69                      | 0.96        |
| 09/15                   | 398.07                     | 1.43        | 396.43                     | 0.95        | 396.31                      | 0.64        |
| 10/15                   | 398.00                     | 2.05        | 397.20                     | 0.76        | 397.49                      | 0.66        |
| 11/15                   | 400.00                     | 0.00        | 398.38                     | 1.12        | 398.93                      | 0.72        |
| 12/15                   | –                          | –           | 399.27                     | 2.03        | 400.22                      | 0.79        |
| 01/16                   | 401.79                     | 0.52        | 400.04                     | 1.63        | 401.81                      | 0.81        |
| 02/16                   | 401.54                     | 0.95        | 400.89                     | 1.03        | 402.44                      | 0.71        |
| 03/16                   | 403.91                     | 1.29        | 402.73                     | 1.16        | 404.12                      | 1.15        |
| 04/16                   | 405.35                     | 1.25        | 404.30                     | 1.03        | 404.69                      | 0.75        |
| 05/16                   | 406.37                     | 0.87        | 405.27                     | 1.21        | 405.50                      | 0.80        |
| 06/16                   | 405.49                     | 0.96        | –                          | –           | 404.10                      | 0.69        |
| 07/16                   | 401.85                     | 3.74        | –                          | –           | 402.91                      | 1.28        |
| 08/16                   | 400.94                     | 0.97        | –                          | –           | 400.32                      | 1.28        |
| 09/16                   | 398.41                     | 1.29        | –                          | –           | 399.38                      | 0.70        |
| 10/16                   | 399.76                     | 1.43        | –                          | –           | 400.22                      | 0.83        |
| 11/16                   | –                          | –           | –                          | –           | 401.62                      | 1.05        |
| 12/16                   | –                          | –           | –                          | –           | 402.79                      | 0.95        |

40 **Table S5.** The monthly averaged (Avg.) values and the standard deviation (Std.) of the satellite XCO<sub>2</sub> retrievals of GOSAT (NIES, ACOS) and OCO-2 for the latitude range 0° N–10° N, 2014–2017.

| <b>Date<br/>(MM/YY)</b> | <b>Avg. NIES<br/>(ppm)</b> | <b>Std.</b> | <b>Avg. ACOS<br/>(ppm)</b> | <b>Std.</b> | <b>Avg. OCO-2<br/>(ppm)</b> | <b>Std.</b> |
|-------------------------|----------------------------|-------------|----------------------------|-------------|-----------------------------|-------------|
| 01/14                   | –                          | –           | 395.36                     | 0.81        | –                           | –           |
| 02/14                   | –                          | –           | 395.94                     | 0.95        | –                           | –           |
| 03/14                   | 396.16                     | 1.52        | 396.80                     | 0.93        | –                           | –           |
| 04/14                   | 399.73                     | 0.78        | 397.85                     | 1.15        | –                           | –           |
| 05/14                   | 399.22                     | 1.23        | 398.56                     | 1.12        | –                           | –           |
| 06/14                   | –                          | –           | 398.10                     | 1.31        | –                           | –           |
| 07/14                   | –                          | –           | 396.89                     | 1.02        | –                           | –           |
| 08/14                   | 398.25                     | 0.97        | 396.99                     | 1.04        | –                           | –           |
| 09/14                   | –                          | –           | 395.94                     | 1.03        | 395.90                      | 0.64        |
| 10/14                   | –                          | –           | 395.15                     | 0.71        | 395.21                      | 0.71        |
| 11/14                   | –                          | –           | 395.71                     | 0.93        | 395.39                      | 0.62        |
| 12/14                   | 396.87                     | 0.82        | 396.73                     | 0.62        | 396.68                      | 0.80        |
| 01/15                   | –                          | –           | 398.31                     | 0.09        | 398.64                      | 0.81        |
| 02/15                   | 398.39                     | 0.00        | 397.97                     | 0.97        | 398.19                      | 0.84        |
| 03/15                   | 399.36                     | 1.09        | 398.81                     | 1.03        | 399.02                      | 0.59        |
| 04/15                   | 399.68                     | 0.94        | 399.59                     | 1.04        | 399.59                      | 0.72        |
| 05/15                   | –                          | –           | 400.62                     | 1.26        | 399.92                      | 0.87        |
| 06/15                   | –                          | –           | 400.29                     | 1.23        | 399.94                      | 0.72        |
| 07/15                   | 402.48                     | 2.94        | 399.40                     | 0.97        | 399.22                      | 0.64        |
| 08/15                   | 398.56                     | 1.54        | 398.96                     | 1.10        | 398.60                      | 0.64        |
| 09/15                   | 400.19                     | 1.58        | 397.80                     | 1.07        | 398.40                      | 0.53        |
| 10/15                   | 398.13                     | 1.61        | 397.77                     | 0.84        | 398.27                      | 0.58        |
| 11/15                   | –                          | –           | 398.35                     | 0.80        | 398.34                      | 0.64        |
| 12/15                   | 400.04                     | 0.00        | 399.17                     | 0.68        | 399.29                      | 0.69        |
| 01/16                   | 400.83                     | 1.05        | 399.96                     | 0.74        | 400.46                      | 0.61        |
| 02/16                   | 401.26                     | 1.37        | 400.58                     | 1.00        | 401.00                      | 0.69        |
| 03/16                   | 401.96                     | 1.69        | 401.55                     | 0.96        | 401.70                      | 0.78        |
| 04/16                   | 404.15                     | 1.26        | 402.59                     | 1.04        | 403.03                      | 0.74        |
| 05/16                   | 405.57                     | 0.00        | 403.37                     | 1.37        | 403.40                      | 0.89        |
| 06/16                   | –                          | –           | –                          | –           | 403.60                      | 0.76        |
| 07/16                   | 402.50                     | 1.11        | –                          | –           | 402.66                      | 0.59        |
| 08/16                   | 401.54                     | 0.51        | –                          | –           | 401.64                      | 0.55        |
| 09/16                   | –                          | –           | –                          | –           | 400.87                      | 0.60        |
| 10/16                   | 400.16                     | 0.33        | –                          | –           | 400.23                      | 0.63        |
| 11/16                   | –                          | –           | –                          | –           | 400.58                      | 0.64        |
| 12/16                   | 402.76                     | 1.29        | –                          | –           | 401.60                      | 0.69        |

45 **Table S6.** The monthly averaged (Avg.) values and the standard deviation (Std.) of the satellite XCO<sub>2</sub> retrievals of GOSAT (NIES, ACOS) and OCO-2 for the latitude range 20° S–10° S, 2014–2017.

| <b>Date<br/>(MM/YY)</b> | <b>Avg. NIES<br/>(ppm)</b> | <b>Std.</b> | <b>Avg. ACOS<br/>(ppm)</b> | <b>Std.</b> | <b>Avg. OCO-2<br/>(ppm)</b> | <b>Std.</b> |
|-------------------------|----------------------------|-------------|----------------------------|-------------|-----------------------------|-------------|
| 01/14                   | 395.45                     | 0.94        | 394.66                     | 0.71        | –                           | –           |
| 02/14                   | 395.35                     | 0.75        | 395.03                     | 0.83        | –                           | –           |
| 03/14                   | 394.58                     | 0.25        | 395.21                     | 0.79        | –                           | –           |
| 04/14                   | –                          | –           | 395.94                     | 1.08        | –                           | –           |
| 05/14                   | 396.49                     | 0.00        | 395.50                     | 0.00        | –                           | –           |
| 06/14                   | –                          | –           | –                          | –           | –                           | –           |
| 07/14                   | –                          | –           | –                          | –           | –                           | –           |
| 08/14                   | 396.08                     | 1.40        | 396.71                     | 0.94        | –                           | –           |
| 09/14                   | 396.79                     | 0.72        | 396.43                     | 1.02        | 396.91                      | 0.50        |
| 10/14                   | 396.71                     | 1.39        | 396.66                     | 0.87        | 396.88                      | 0.52        |
| 11/14                   | 397.67                     | 0.73        | 396.82                     | 0.95        | 396.89                      | 0.54        |
| 12/14                   | 397.20                     | 0.51        | 396.61                     | 0.89        | 396.82                      | 0.58        |
| 01/15                   | –                          | –           | –                          | –           | 396.78                      | 0.53        |
| 02/15                   | 395.68                     | 0.00        | 396.62                     | 1.27        | 396.71                      | 0.66        |
| 03/15                   | 396.44                     | 1.33        | 397.04                     | 1.01        | 397.25                      | 0.52        |
| 04/15                   | 399.76                     | 0.51        | 397.51                     | 1.29        | 397.47                      | 0.46        |
| 05/15                   | 398.41                     | 1.57        | 397.34                     | 1.12        | 398.17                      | 0.49        |
| 06/15                   | 397.55                     | 0.70        | 397.77                     | 0.88        | 398.32                      | 0.49        |
| 07/15                   | 398.84                     | 1.10        | 398.00                     | 1.13        | 398.87                      | 0.50        |
| 08/15                   | 398.16                     | 0.79        | 398.49                     | 1.00        | 398.85                      | 0.50        |
| 09/15                   | 398.29                     | 0.81        | 398.70                     | 1.18        | 398.78                      | 0.54        |
| 10/15                   | 399.46                     | 1.12        | 398.71                     | 0.96        | 399.08                      | 0.56        |
| 11/15                   | 399.71                     | 1.07        | 399.30                     | 1.05        | 399.32                      | 0.56        |
| 12/15                   | 400.30                     | 0.68        | 398.98                     | 0.92        | 399.35                      | 0.60        |
| 01/16                   | 399.59                     | 1.05        | 399.55                     | 0.97        | 399.68                      | 0.57        |
| 02/16                   | 399.47                     | 0.48        | 399.63                     | 0.93        | 399.67                      | 0.51        |
| 03/16                   | 399.77                     | 0.13        | 400.12                     | 1.07        | 399.99                      | 0.58        |
| 04/16                   | 400.10                     | 0.00        | 400.45                     | 0.88        | 400.57                      | 0.55        |
| 05/16                   | 400.60                     | 1.09        | 400.18                     | 1.21        | 401.10                      | 0.68        |
| 06/16                   | 402.52                     | 1.69        | –                          | –           | 401.55                      | 0.60        |
| 07/16                   | 402.60                     | 1.28        | –                          | –           | 401.85                      | 0.67        |
| 08/16                   | 401.62                     | 1.27        | –                          | –           | 401.62                      | 0.55        |
| 09/16                   | 401.09                     | 0.74        | –                          | –           | 401.30                      | 0.47        |
| 10/16                   | 401.82                     | 0.97        | –                          | –           | 401.34                      | 0.57        |
| 11/16                   | 401.90                     | 0.81        | –                          | –           | 401.40                      | 0.54        |
| 12/16                   | 402.20                     | 0.58        | –                          | –           | 401.68                      | 0.57        |

50 **Table S7.** Monthly in situ based XCO<sub>2</sub> values (in situ XCO<sub>2</sub>) and its uncertainty interval derived from ±2 ppm variability in the in situ CO<sub>2</sub> profile at ~850 hPa (see text) for the latitude range 20° N–30° N, 2014–2017.

| <b>Date<br/>(MM/YY)</b> | <b>In situ XCO<sub>2</sub><br/>(ppm)</b> | <b>+2 ppm<br/>uncertainty</b> | <b>-2 ppm<br/>uncertainty</b> |
|-------------------------|------------------------------------------|-------------------------------|-------------------------------|
| 01/14                   | –                                        | –                             | –                             |
| 02/14                   | –                                        | –                             | –                             |
| 03/14                   | 400.24                                   | 400.87                        | 399.61                        |
| 04/14                   | 400.71                                   | 401.33                        | 400.08                        |
| 05/14                   | 401.99                                   | 402.62                        | 401.36                        |
| 06/14                   | 400.70                                   | 401.33                        | 400.08                        |
| 07/14                   | 398.80                                   | 399.42                        | 398.17                        |
| 08/14                   | 396.07                                   | 396.69                        | 395.44                        |
| 09/14                   | 395.54                                   | 396.16                        | 394.92                        |
| 10/14                   | 396.38                                   | 397.00                        | 395.76                        |
| 11/14                   | 398.38                                   | 398.99                        | 397.77                        |
| 12/14                   | 398.78                                   | 399.36                        | 398.19                        |
| 01/15                   | –                                        | –                             | –                             |
| 02/15                   | 400.38                                   | 401.00                        | 399.75                        |
| 03/15                   | 401.02                                   | 401.65                        | 400.40                        |
| 04/15                   | 402.31                                   | 402.94                        | 401.68                        |
| 05/15                   | 402.58                                   | 403.21                        | 401.96                        |
| 06/15                   | 402.87                                   | 403.50                        | 402.24                        |
| 07/15                   | 400.82                                   | 401.44                        | 400.19                        |
| 08/15                   | 399.22                                   | 399.84                        | 398.60                        |
| 09/15                   | 397.80                                   | 398.43                        | 397.17                        |
| 10/15                   | 399.43                                   | 400.05                        | 398.80                        |
| 11/15                   | 399.52                                   | 400.12                        | 398.92                        |
| 12/15                   | 401.55                                   | 402.14                        | 400.96                        |
| 01/16                   | –                                        | –                             | –                             |
| 02/16                   | 403.02                                   | 403.64                        | 402.40                        |
| 03/16                   | 404.31                                   | 404.94                        | 403.69                        |
| 04/16                   | 406.37                                   | 407.00                        | 405.74                        |
| 05/16                   | 407.29                                   | 407.91                        | 406.67                        |
| 06/16                   | 405.62                                   | 406.25                        | 404.38                        |
| 07/16                   | 404.06                                   | 404.69                        | 402.80                        |
| 08/16                   | 401.52                                   | 402.14                        | 400.89                        |
| 09/16                   | 400.59                                   | 401.22                        | 399.97                        |
| 10/16                   | 401.30                                   | 401.92                        | 400.67                        |
| 11/16                   | –                                        | –                             | –                             |
| 12/16                   | –                                        | –                             | –                             |

55 **Table S8.** Monthly in situ based XCO<sub>2</sub> values (in situ XCO<sub>2</sub>) and its uncertainty interval derived from  $\pm 2$  ppm variability in the in situ CO<sub>2</sub> profile at  $\sim 850$  hPa (see text) for the latitude range 0° N–10° N, 2014–2017.

| <b>Date<br/>(MM/YY)</b> | <b>In situ XCO<sub>2</sub><br/>(ppm)</b> | <b>+2 ppm<br/>uncertainty</b> | <b>-2 ppm<br/>uncertainty</b> |
|-------------------------|------------------------------------------|-------------------------------|-------------------------------|
| 01/14                   | –                                        | –                             | –                             |
| 02/14                   | –                                        | –                             | –                             |
| 03/14                   | 397.95                                   | 398.57                        | 397.33                        |
| 04/14                   | 398.44                                   | 399.06                        | 397.81                        |
| 05/14                   | 399.31                                   | 399.94                        | 398.69                        |
| 06/14                   | 399.04                                   | 399.67                        | 398.42                        |
| 07/14                   | 397.97                                   | 398.59                        | 397.35                        |
| 08/14                   | 397.17                                   | 397.79                        | 396.54                        |
| 09/14                   | 396.31                                   | 396.94                        | 395.69                        |
| 10/14                   | 396.59                                   | 397.22                        | 395.97                        |
| 11/14                   | 397.00                                   | 397.62                        | 396.38                        |
| 12/14                   | 397.43                                   | 398.05                        | 396.81                        |
| 01/15                   | –                                        | –                             | –                             |
| 02/15                   | 399.90                                   | 400.53                        | 399.28                        |
| 03/15                   | 399.87                                   | 400.49                        | 399.24                        |
| 04/15                   | 400.01                                   | 400.63                        | 399.38                        |
| 05/15                   | 401.08                                   | 401.70                        | 400.45                        |
| 06/15                   | 400.86                                   | 401.48                        | 400.24                        |
| 07/15                   | –                                        | –                             | –                             |
| 08/15                   | 398.71                                   | 399.33                        | 398.08                        |
| 09/15                   | –                                        | –                             | –                             |
| 10/15                   | 398.74                                   | 399.37                        | 398.12                        |
| 11/15                   | –                                        | –                             | –                             |
| 12/15                   | 400.68                                   | 401.29                        | 400.06                        |
| 01/16                   | –                                        | –                             | –                             |
| 02/16                   | 402.46                                   | 403.08                        | 401.83                        |
| 03/16                   | 403.49                                   | 404.11                        | 402.87                        |
| 04/16                   | 404.61                                   | 405.23                        | 403.99                        |
| 05/16                   | 404.43                                   | 405.06                        | 403.81                        |
| 06/16                   | –                                        | –                             | –                             |
| 07/16                   | –                                        | –                             | –                             |
| 08/16                   | 402.52                                   | 403.15                        | 401.89                        |
| 09/16                   | –                                        | –                             | –                             |
| 10/16                   | 401.58                                   | 402.21                        | 400.95                        |
| 11/16                   | –                                        | –                             | –                             |
| 12/16                   | 403.61                                   | 404.23                        | 402.99                        |

**Table S9.** Monthly in situ based XCO<sub>2</sub> values (in situ XCO<sub>2</sub>) and its uncertainty interval derived from  $\pm 2$  ppm variability in the in situ CO<sub>2</sub> profile at  $\sim 850$  hPa (see text) for the latitude range 20° S–10° S, 2014–2017.

| <b>Date<br/>(MM/YY)</b> | <b>In situ XCO<sub>2</sub><br/>(ppm)</b> | <b>+2 ppm<br/>uncertainty</b> | <b>-2 ppm<br/>uncertainty</b> |
|-------------------------|------------------------------------------|-------------------------------|-------------------------------|
| 01/14                   | –                                        | –                             | –                             |
| 02/14                   | –                                        | –                             | –                             |
| 03/14                   | –                                        | –                             | –                             |
| 04/14                   | 395.87                                   | 396.50                        | 395.25                        |
| 05/14                   | 395.64                                   | 396.26                        | 395.01                        |
| 06/14                   | –                                        | –                             | –                             |
| 07/14                   | –                                        | –                             | –                             |
| 08/14                   | 396.26                                   | 396.88                        | 395.64                        |
| 09/14                   | 395.96                                   | 396.58                        | 395.34                        |
| 10/14                   | 396.54                                   | 397.16                        | 395.91                        |
| 11/14                   | 397.26                                   | 397.88                        | 396.63                        |
| 12/14                   | 398.24                                   | 398.86                        | 397.61                        |
| 01/15                   | –                                        | –                             | –                             |
| 02/15                   | 396.99                                   | 397.62                        | 396.37                        |
| 03/15                   | 397.09                                   | 397.71                        | 396.47                        |
| 04/15                   | 397.85                                   | 398.47                        | 397.24                        |
| 05/15                   | 398.26                                   | 398.88                        | 397.64                        |
| 06/15                   | 398.26                                   | 398.88                        | 397.65                        |
| 07/15                   | –                                        | –                             | –                             |
| 08/15                   | 398.40                                   | 399.02                        | 397.78                        |
| 09/15                   | –                                        | –                             | –                             |
| 10/15                   | 398.62                                   | 399.25                        | 398.00                        |
| 11/15                   | –                                        | –                             | –                             |
| 12/15                   | 400.79                                   | 401.40                        | 400.18                        |
| 01/16                   | 400.87                                   | 399.62                        | 400.24                        |
| 02/16                   | 400.58                                   | 401.21                        | 399.96                        |
| 03/16                   | 401.46                                   | 402.08                        | 400.84                        |
| 04/16                   | 401.29                                   | 401.92                        | 400.67                        |
| 05/16                   | 401.03                                   | 401.65                        | 400.41                        |
| 06/16                   | –                                        | –                             | –                             |
| 07/16                   | –                                        | –                             | –                             |
| 08/16                   | 401.58                                   | 402.18                        | 400.98                        |
| 09/16                   | 401.74                                   | 402.36                        | 401.13                        |
| 10/16                   | 401.33                                   | 401.95                        | 400.72                        |
| 11/16                   | 401.85                                   | 402.46                        | 401.24                        |
| 12/16                   | 402.43                                   | 403.05                        | 401.81                        |
